# Supplementary material for: Oligoaniline-Functionalized terpyridine ligands and their ruthenium(II) complexes: synthesis, spectroscopic property and redox behavior
Source: Royal Society of Chemistry journal article supplement (doi:10.1039/b820392j), 2009-01-01
Supplement: b820392j.pdf [file b820392j.pdf]

Electronic Supporting Information (ESI) for:

## **Oligoaniline-Functionalized Terpyridine Ligands and Their Ruthenium(II) Complexes: Synthesis, Spectroscopic Properties and Redox Behavior**

Dongfang Qiu, Yanxiang Cheng, and Lixiang Wang

**Figure S1.** 300MHz  $^1\text{H}$  NMR spectra of the BOC-substituted mononuclear and dinuclear Ru(II) complexes.

**Figure S2.** 300 MHz  $^1\text{H}$  NMR spectra of Bu-substituted mononuclear Ru(II) complexes.

**Figure S3.** 300 MHz  $^1\text{H}$  NMR spectra of oligoaniline functionalized mononuclear and dinuclear Ru(II) complexes.

**Figure S4.** UV-vis spectra of the BOC- and Bu-substituted ligands and complexes in DMF solutions.

**Figure S5.** Influence of oxidant and dopant on the UV-vis-NIR spectra of the ligands and complexes in DMF solutions.

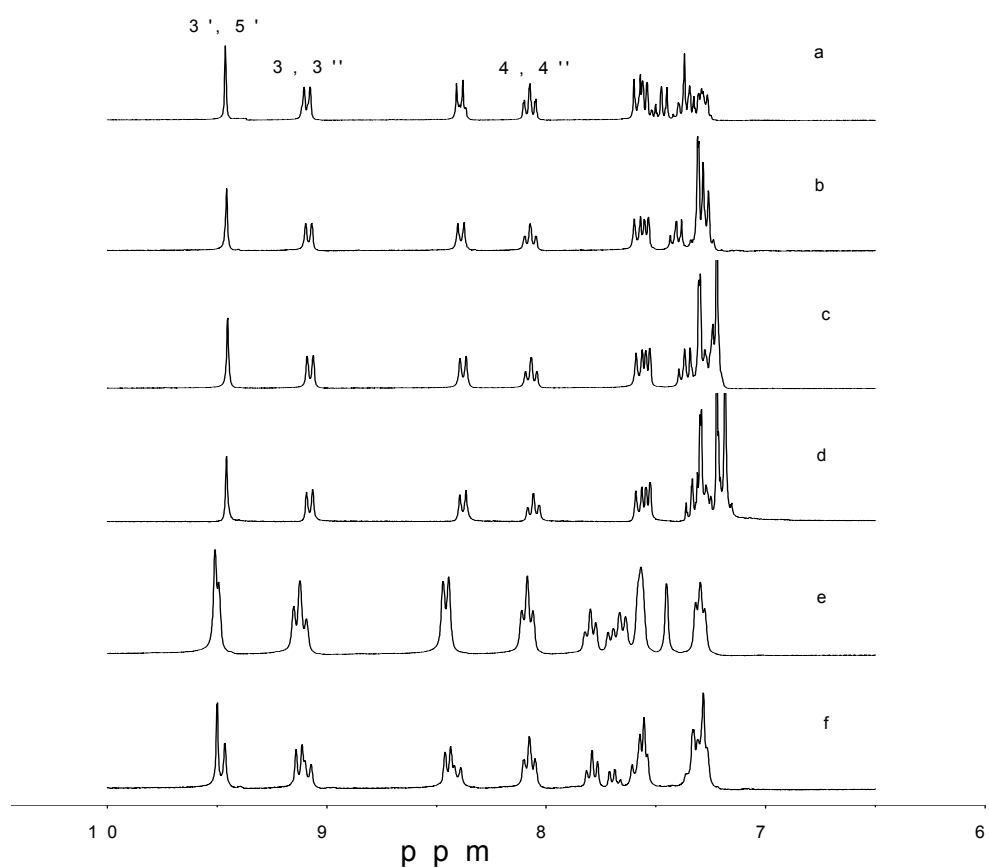

**Fig. S1.** 300 MHz  $^1\text{H}$  NMR spectra of the BOC-substituted mononuclear and dinuclear Ru(II) complexes.

- (a)  $[\text{Ru}(\text{L}^7)_2](\text{PF}_6)_2$ ; (b)  $[\text{Ru}(\text{L}^8)_2](\text{PF}_6)_2$ ; (c)  $[\text{Ru}(\text{L}^9)_2](\text{PF}_6)_2$ ; (d)  $[\text{Ru}(\text{L}^{10})_2](\text{PF}_6)_2$ ;  
(e)  $[(\text{PTPY})\text{Ru}(\text{L}^{11})\text{Ru}(\text{PTPY})](\text{PF}_6)_4$ ; (f)  $[(\text{PTPY})\text{Ru}(\text{L}^{12})\text{Ru}(\text{PTPY})](\text{PF}_6)_4$ .

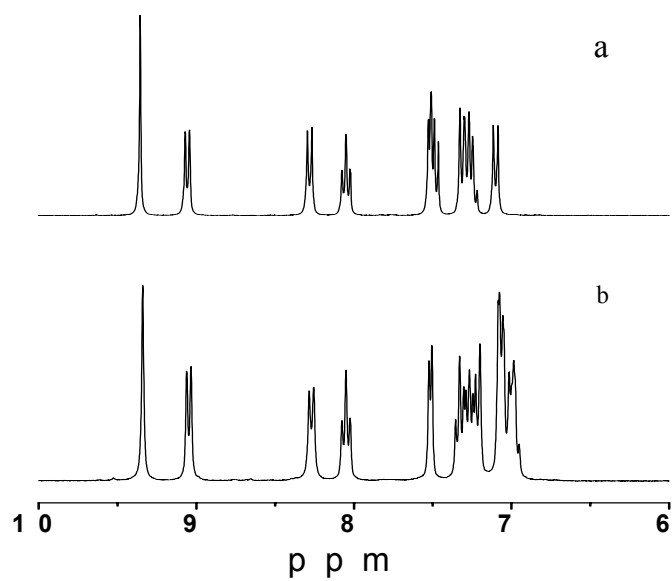

**Fig. S2.** 300 MHz <sup>1</sup>H NMR spectra of Bu-substituted mononuclear Ru(II) complexes.

(a) [Ru(L<sup>13</sup>)<sub>2</sub>](PF<sub>6</sub>)<sub>2</sub>; (b) [Ru(L<sup>14</sup>)<sub>2</sub>](PF<sub>6</sub>)<sub>2</sub>.

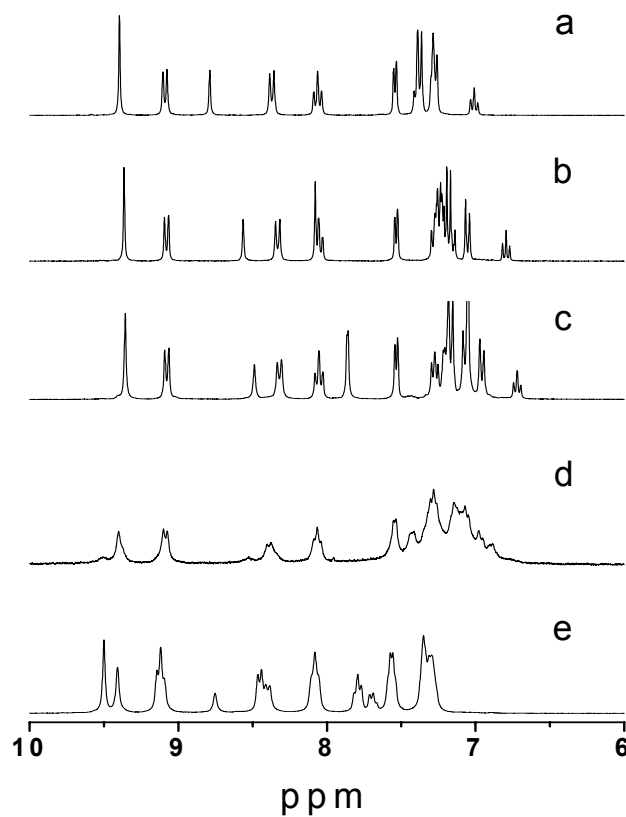

**Fig. S3.** 300 MHz  $^1\text{H}$  NMR spectra of oligoaniline functionalized mononuclear and dinuclear Ru(II) complexes.

(a)  $[\text{Ru}(\text{L}^1)_2](\text{PF}_6)_2$ ; (b)  $[\text{Ru}(\text{L}^2)_2](\text{PF}_6)_2$ ; (c)  $[\text{Ru}(\text{L}^3)_2](\text{PF}_6)_2$ ; (d)  $[\text{Ru}(\text{L}^4)_2](\text{PF}_6)_2$ ;

(e)  $[(\text{PTPY})\text{Ru}(\text{L}^5)\text{Ru}(\text{PTPY})](\text{PF}_6)_4$ .

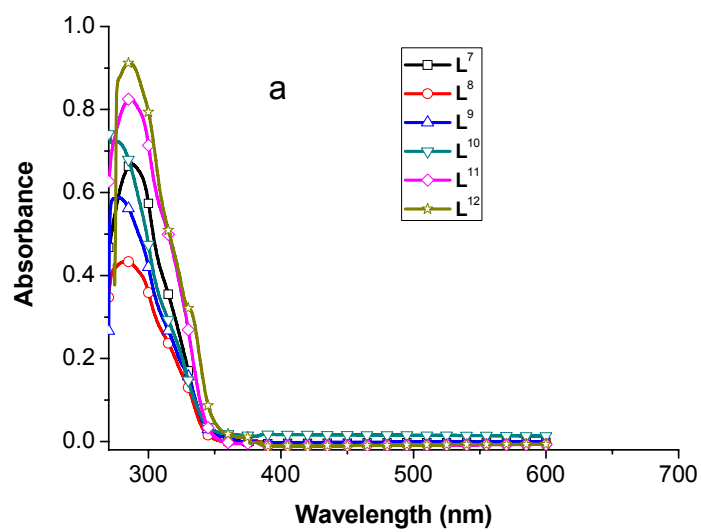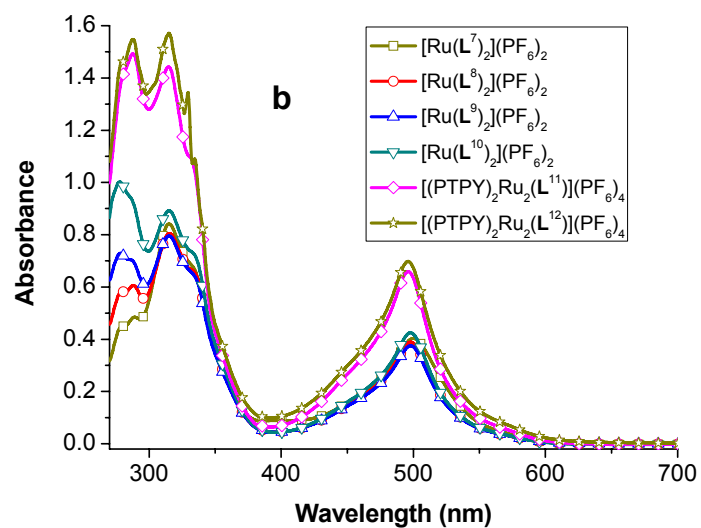

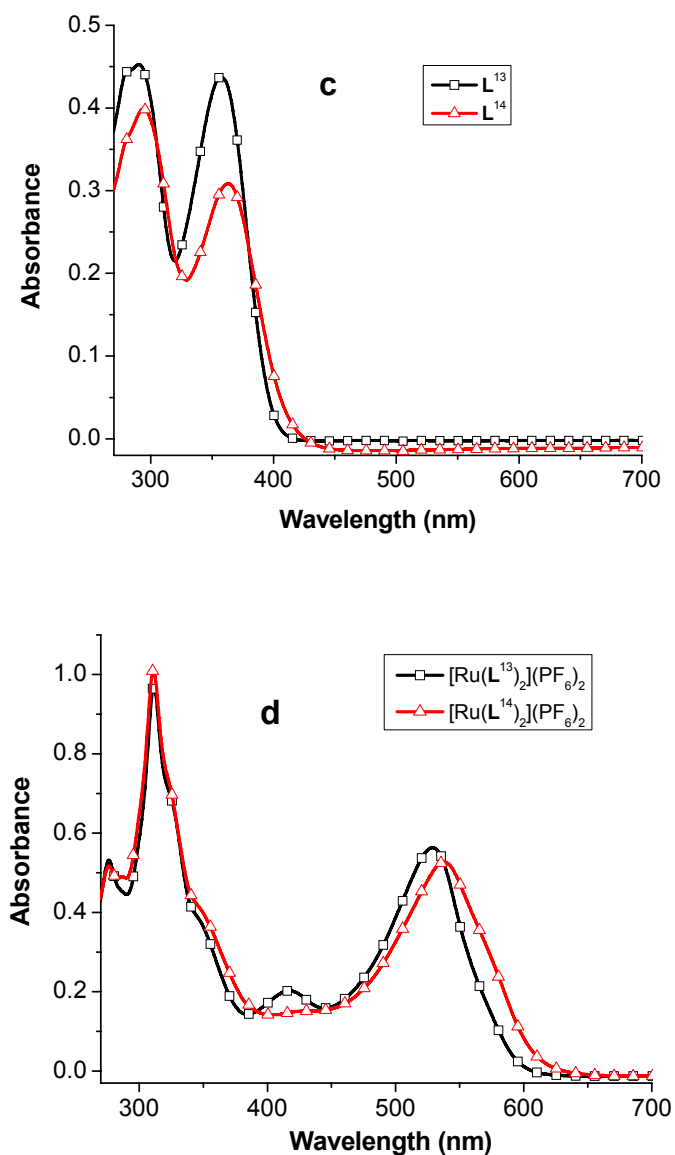

**Fig. S4.** UV-vis spectra of the BOC- and Bu-substituted ligands and complexes in DMF solutions.

- (a) the BOC-substituted ligands;
- (b) the BOC-substituted complexes;
- (c) the Bu-substituted ligands;
- (d) the Bu-substituted complexes.

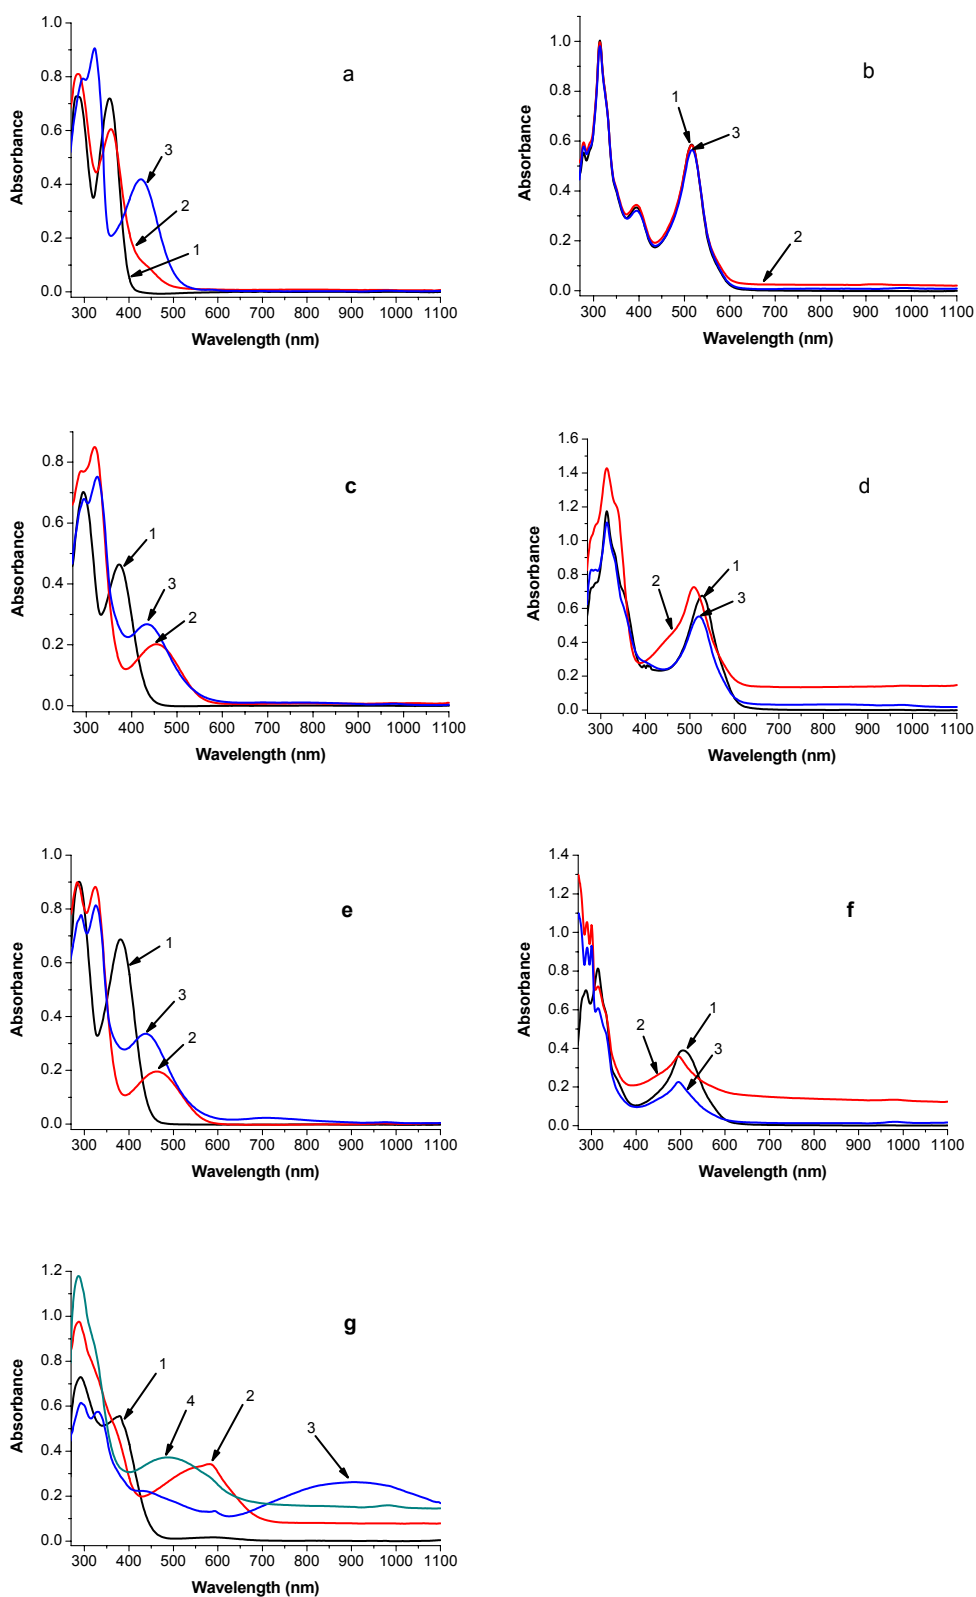

**Fig. S5.** Influence of oxidant and dopant on the UV-vis-NIR spectra of the ligands and complexes in DMF solutions.

(a)  $L^1$ ; (b)  $[Ru(L^1)_2](PF_6)_2$ ; (c)  $L^2$ ; (d)  $[Ru(L^2)_2](PF_6)_2$ ; (e)  $L^5$ ;

(f) [(PTPY)Ru(L<sup>5</sup>)Ru(PTPY)](PF<sub>6</sub>)<sub>4</sub>; (g) L<sup>6</sup>: the LEB form (1); the EB form (2);  
the doped form (3); the PNB form (4).
